# Supplementary material for: Rhizosphere Microbe Affects Soil Available Nitrogen and Its Implication for the Ecological Adaptability and Rapid Growth of Dendrocalamus sinicus, the Strongest Bamboo in the World
Source: MDPI journal article supplement (doi:10.3390/ijms241914665), 2023-09-28
Supplement: s1 [file s1]

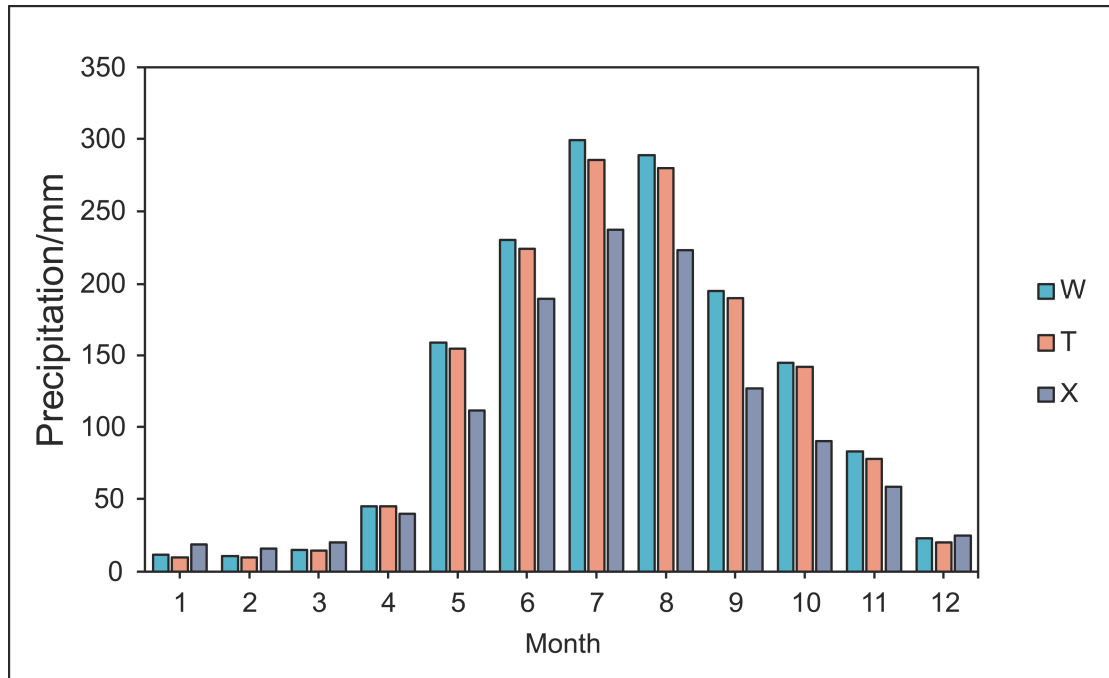

Figure S2. Annual precipitation change.

Note: W, the habitat of bending type; T, the habitat of straight type; X, the habitat of introduced straight type.
