# Supplementary material for: Rhizosphere Microbe Affects Soil Available Nitrogen and Its Implication for the Ecological Adaptability and Rapid Growth of Dendrocalamus sinicus, the Strongest Bamboo in the World
Source: MDPI journal article supplement (doi:10.3390/ijms241914665), 2023-09-28
Supplement: s1 [file s1]

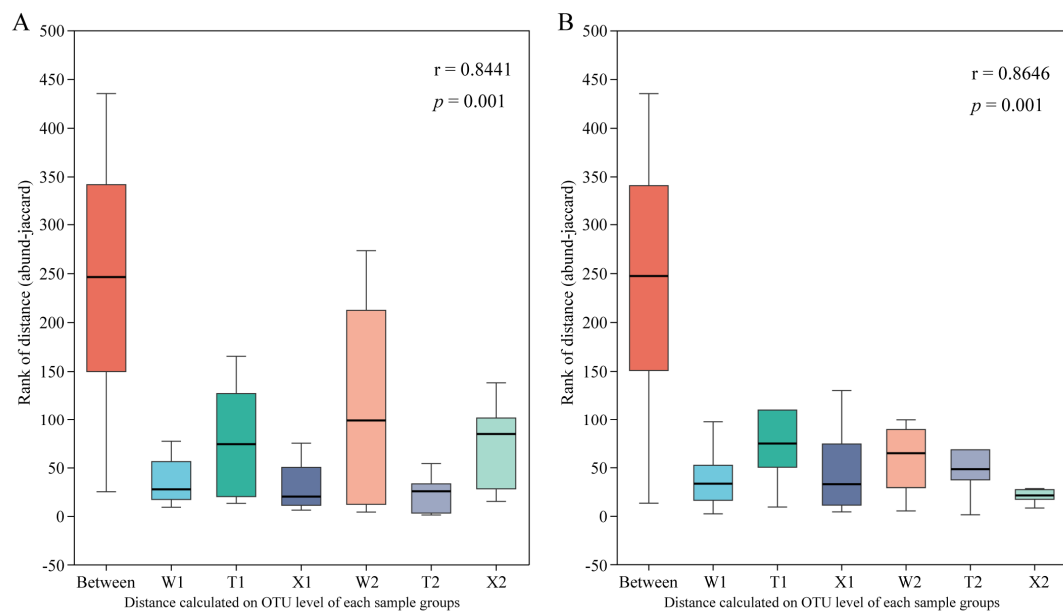

Figure S1. ANOSIM analysis based on abund-jaccard distance of the soil bacterial (A) and fungal (B) communities.

Note: W1, rhizosphere soil sample of bending type in May; W2, rhizosphere soil sample of bending type in August; T1, rhizosphere soil sample of straight type in May; T2, rhizosphere soil sample of straight type in August; X1, rhizosphere soil sample of introduced straight type in May; X2, rhizosphere soil sample of introduced straight type in August.
