# Supplementary material for: Rhizosphere Microbe Affects Soil Available Nitrogen and Its Implication for the Ecological Adaptability and Rapid Growth of Dendrocalamus sinicus, the Strongest Bamboo in the World
Source: MDPI journal article supplement (doi:10.3390/ijms241914665), 2023-09-28
Supplement: s1 [file s1]

Table S1. Relative abundance of microbial phylum in soil samples

|          | Samples           | W1/%  | T1/%  | X1/%  | W2/%  | T2/%  | X2/%  |
|----------|-------------------|-------|-------|-------|-------|-------|-------|
| Bacteria | Actinobacteria    | 40.36 | 22.99 | 31.35 | 44.19 | 34.99 | 40.89 |
|          | Proteobacteria    | 32.93 | 30.05 | 21.32 | 29.31 | 24.69 | 15.47 |
|          | Acidobacteria     | 10.12 | 10.62 | 8.43  | 6.87  | 9.55  | 10.19 |
|          | Firmicutes        | 4.37  | 9.96  | 5.04  | 7.85  | 14.05 | 12.25 |
|          | Chloroflexi       | 0.93  | 6.90  | 16.99 | 2.26  | 3.71  | 11.40 |
|          | Myxococcota       | 3.33  | 8.21  | 5.03  | 3.63  | 5.23  | 3.78  |
|          | Verrucomicrobia   | 1.72  | 8.31  | 7.73  | 1.97  | 4.77  | 2.92  |
|          | Gemmatimonadetes  | 0.84  | 0.92  | 1.91  | 1.70  | 1.24  | 1.36  |
|          | Bacteroidetes     | 2.09  | 0.66  | 0.67  | 0.58  | 0.31  | 0.47  |
|          | Planctomycetes    | 0.45  | 0.69  | 0.49  | 0.61  | 1.24  | 0.56  |
|          | Nitrospirae       | 1.88  | 0.28  | 0.34  | 0.57  | 0.01  | 0.12  |
|          | Samples           | W1/%  | T1/%  | X1/%  | W2/%  | T2/%  | X2/%  |
| Fungi    | Ascomycota        | 68.57 | 43.28 | 61.16 | 47.36 | 53.56 | 50.21 |
|          | Basidiomycota     | 23.42 | 52.09 | 35.27 | 47.08 | 37.83 | 45.75 |
|          | Mortierellomycota | 5.73  | 2.49  | 0.92  | 2.77  | 6.27  | 1.41  |
|          | Glomeromycota     | 1.99  | 0.53  | 1.69  | 0.46  | 0.26  | 1.66  |
|          | Kickxellomycota   | 0.10  | 0.44  | 0.07  | 1.65  | 1.68  | 0.04  |

Note: W1, rhizosphere soil sample of bending type in May; W2, rhizosphere soil sample of bending type in August; T1, rhizosphere soil sample of straight type in May; T2, rhizosphere soil sample of straight type in August; X1, rhizosphere soil sample of introduced straight type in May; X2, rhizosphere soil sample of introduced straight type in August.

Table S2. Analysis of differences in main microbial genera among soil samples

|          |                           | W1              | T1              | X1              | W2              | T2              | X2              |
|----------|---------------------------|-----------------|-----------------|-----------------|-----------------|-----------------|-----------------|
| Bacteria | <i>Bacillus</i>           | 178.8±39.26 c   | 560.6±53.92 ab  | 204.4±48.81 c   | 322.2±86.28 bc  | 803.0±181.50 a  | 577.6±131.31 ab |
|          | <i>Bradyrhizobium</i>     | 279.4±12.05 c   | 691.8±34.76 a   | 454.6±66.68 b   | 665.0±60.95 a   | 737.8±18.92 a   | 324.0±24.12 c   |
|          | <i>Mycobacterium</i>      | 104.0±17.99 c   | 122.0±18.06 bc  | 213.2±37.27 ab  | 228.4±51.97 a   | 193.2±19.23 abc | 197.4±32.73 abc |
|          | <i>Kitasatospora</i>      | 178.4±10.82 bc  | 132.2±30.21 c   | 120.0±10.07 c   | 327.0±17.50 a   | 277.8±79.15 ab  | 237.2±37.97 abc |
|          | <i>Sphingomonas</i>       | 240.8±38.22 ab  | 146.4±21.56b    | 308.4±71.09 a   | 126.2±18.75b    | 130.0±36.60b    | 214.4±18.10 ab  |
|          | <i>RB41</i>               | 486.2±49.86 a   | 300.4±56.21 b   | 186.2±53.96 b   | 210.6±69.40 b   | 230.6±83.25 b   | 233.4±39.66 b   |
|          | <i>Gaiella</i>            | 453.6±15.32 a   | 198.6±90.19 bc  | 212.6±48.42 bc  | 357.8±75.52 ab  | 143.2±36.22 c   | 241.8±46.58 bc  |
|          | <i>Haliangium</i>         | 162.0±17.46 ab  | 195.4±26.66 a   | 114.8±17.84 b   | 133.0±9.71 b    | 162.6±10.45 ab  | 128.6±10.16 b   |
|          |                           | W1              | T1              | X1              | W2              | T2              | X2              |
| Fungi    | <i>Cladophialophora</i>   | 278.8±70.54 ab  | 117.0±24.76 ab  | 491.4±112.76 ab | 149.4±52.66 b   | 232.8±44.55 a   | 334.6±111.77 ab |
|          | <i>Trichoderma</i>        | 599.2±119.50 ab | 666.2±239.99 ab | 306.6±45.35 b   | 520.4±220.65 ab | 877.6±115.64 a  | 344.2±138.47 b  |
|          | <i>Penicillium</i>        | 307.8±132.28 ab | 497.6±70.26 ab  | 247.0±70.18 ab  | 198.2±55.15 b   | 651.4±272.98 a  | 295.0±58.60 ab  |
|          | <i>Apiotrichum</i>        | 776.6±331.59 a  | 12.4±6.87 b     | 1.3±1.18 b      | 155.0±106.93 b  | 42.6±23.40 b    | 1.7±1.35 b      |
|          | <i>Fusarium</i>           | 390.2±101.87 a  | 27.8±7.08 c     | 171.0±42.73 bc  | 53.2±16.73 c    | 94.4±39.97 bc   | 230.2±44.66 b   |
|          | <i>Exophiala</i>          | 234.6±76.41 a   | 62.0±12.21 b    | 47.0±11.14 b    | 140.2±71.47 ab  | 162.8±49.16 ab  | 16.0±12.50 b    |
|          | <i>Acremonium</i>         | 204.4±33.82 a   | 48.4±16.76 bc   | 35.4±6.85 c     | 106.0±15.11 b   | 76.6±22.51 bc   | 67.0±23.87 bc   |
|          | <i>Cordana</i>            | 177.2±76.60 a   | 5.82±2.28 b     | 8.22±4.15 b     | 252.8±77.48 a   | 24.2±12.96 b    | 3.04±1.66 b     |
|          | <i>Neocosmospora</i>      | 199.2±29.57 a   | 2.42±1.02 c     | 100.2±26.22 b   | 22.8±9.90 c     | 1.02±0.30 c     | 105.4±34.68 b   |
|          | <i>Tremellodendropsis</i> | 0.1±0.00 b      | 575.4±421.57 a  | 0.1±0.00 b      | 0.28±0.18 b     | 105.42±67.38 ab | 0.1±0.00 b      |
|          | <i>Archaeorhizomyces</i>  | 0.1±0.00 b      | 382.0±120.49 a  | 37.82±26.52 b   | 2.82±1.23 b     | 320.0±147.58 a  | 5.46±4.25 b     |
|          | <i>Camarophyllus</i>      | 0.1±0.00 b      | 617.46±394.69 a | 1.06±0.61 b     | 0.1±0.00 b      | 0.1±0.00 b      | 0.1±0.00 b      |
|          | <i>Leohumicola</i>        | 0.1±0.00 b      | 393.4±149.62 a  | 39.62±11.04 b   | 100.2±56.84 b   | 60.8±18.77 b    | 0.46±0.22 b     |

Note: W1, rhizosphere soil sample of bending type in May; W2, rhizosphere soil sample of bending type in August; T1, rhizosphere soil sample of straight type in May; T2, rhizosphere soil sample of straight type in August; X1, rhizosphere soil sample of introduced straight type in May; X2, rhizosphere soil sample of introduced straight type in August. Different letters in the same line indicate significant differences ( $p < 0.05$ ).

Table S3. Analysis of differences in some bacterial functions among soil samples

|                           | W1              | T1             | X1               | W2              | T2              | X2               |
|---------------------------|-----------------|----------------|------------------|-----------------|-----------------|------------------|
| chemoheterotrophy         | 3319.8±105.53 b | 2649.8±75.37 c | 2905.4±247.40 bc | 3922.2±128.44 a | 3280.4±255.51 b | 3025.4±159.04 bc |
| aerobic_chemoheterotrophy | 3233.4±101.86 b | 2618.4±76.90 c | 2872.8±246.90 bc | 3849.2±119.35 a | 3249.4±257.56 b | 2985.2±157.73 bc |
| nitrogen_fixation         | 283.2±12.00 c   | 695.2±33.92 a  | 457.8±67.04 b    | 668.8±59.63 a   | 740.2±18.82 a   | 325.4±23.82 c    |
| cellulolysis              | 66.2±17.79 b    | 482.0±127.48 a | 634.8±74.05 a    | 565.6±184.83 a  | 660.0±133.57 a  | 422.6±45.80 a    |
| nitrate_reduction         | 394.2±28.72 a   | 128.0±25.82 c  | 131.4±12.14 c    | 255.0±39.59 b   | 178.8±17.30 bc  | 197.4±40.84 bc   |
| ureolysis                 | 73.4±4.69 b     | 59.2±7.98 b    | 65.0±5.62 b      | 65.8±19.38 b    | 67.6±7.03 b     | 144.8±44.62 a    |

Note: W1, rhizosphere soil sample of bending type in May; W2, rhizosphere soil sample of bending type in August; T1, rhizosphere soil sample of straight type in May; T2, rhizosphere soil sample of straight type in August; X1, rhizosphere soil sample of introduced straight type in May; X2, rhizosphere soil sample of introduced straight type in August. Different letters in the same line indicate significant differences ( $p < 0.05$ ).

Table S4. Relative abundance of different functional fungal groups

|              | Guild                  | W1/%  | T1/%  | X1/%  | W2/%  | T2/%  | X2/%  |
|--------------|------------------------|-------|-------|-------|-------|-------|-------|
| Saprotrophic | Dung Saprotroph        | 2.59  | 0.12  | 5.75  | 0.09  | 0.03  | 0.37  |
|              | Leaf Saprotroph        | 0.13  | 0.02  | 0.05  | 0.18  | 0.03  | 0.05  |
|              | Plant Saprotroph       | 0.79  | 0.08  | 1.36  | 0.11  | 0.18  | 1.47  |
|              | Saprotrophic           | 0.00  | 0.00  | 0.02  | 0.00  | 0.00  | 0.00  |
|              | Soil Saprotroph        | 14.48 | 6.21  | 0.74  | 3.51  | 6.72  | 0.36  |
|              | Undefined Saprotroph   | 58.45 | 84.48 | 71.80 | 67.80 | 71.09 | 76.71 |
|              | Wood Saprotroph        | 5.45  | 2.76  | 2.52  | 13.87 | 2.88  | 5.89  |
|              | Sum                    | 81.90 | 93.67 | 82.24 | 85.57 | 80.93 | 84.84 |
|              | Guild                  | W1/%  | T1/%  | X1/%  | W2/%  | T2/%  | X2/%  |
| Pathogen     | Animal Pathogen        | 6.36  | 1.99  | 3.16  | 8.38  | 1.73  | 7.30  |
|              | Plant Pathogen         | 3.17  | 2.97  | 5.83  | 1.44  | 1.47  | 3.40  |
|              | Fungal Parasite        | 2.93  | 0.14  | 0.56  | 2.16  | 1.19  | 0.74  |
|              | Lichen Parasite        | 0.00  | 0.01  | 0.00  | 0.00  | 0.00  | 0.01  |
|              | Sum                    | 12.46 | 5.11  | 9.55  | 11.98 | 4.39  | 11.44 |
|              | Guild                  | W1/%  | T1/%  | X1/%  | W2/%  | T2/%  | X2/%  |
| Symbiotroph  | Animal Endosymbiont    | 0.00  | 0.00  | 0.00  | 0.00  | 0.00  | 0.02  |
|              | Arbuscular Mycorrhizal | 2.93  | 0.69  | 2.39  | 0.86  | 0.40  | 2.55  |
|              | Ectomycorrhizal        | 0.34  | 0.06  | 0.36  | 0.39  | 11.94 | 0.14  |
|              | Endophyte              | 0.29  | 0.10  | 4.06  | 1.04  | 0.36  | 0.88  |
|              | Lichenized             | 2.08  | 0.36  | 1.40  | 0.16  | 1.18  | 0.13  |
|              | Orchid Mycorrhizal     | 0.00  | 0.01  | 0.00  | 0.00  | 0.81  | 0.00  |
|              | Sum                    | 5.64  | 1.22  | 8.21  | 2.44  | 14.69 | 3.72  |

Note: W1, rhizosphere soil sample of bending type in May; W2, rhizosphere soil sample of bending type in August; T1, rhizosphere soil sample of straight type in May; T2, rhizosphere soil sample of straight type in August; X1, rhizosphere soil sample of introduced straight type in May; X2, rhizosphere soil sample of introduced straight type in August. Different letters in the same line indicate significant differences ( $p < 0.05$ ).

Table S5. Soil microbial communities with significant differences

|          | Species name                  | group        | Mean        | LDA_value        | Pvalue        |
|----------|-------------------------------|--------------|-------------|------------------|---------------|
| Bacteria | <i>Pedomicrobium</i>          | W1           | 4.767345    | 4.433512         | 0.000579      |
|          | <i>Solirubrobacter</i>        | W1           | 4.687853    | 4.405673         | 0.000112      |
|          | <i>Gaiella</i>                | W1           | 5.023153    | 4.621723         | 0.007118      |
|          | <i>Micromonospora</i>         | W1           | 4.481648    | 4.164797         | 0.004619      |
|          | <i>Arthrobacter</i>           | W1           | 4.527378    | 4.231651         | 0.002643      |
|          | <i>Nocardioides</i>           | W1           | 4.780194    | 4.442551         | 0.000762      |
|          | <i>Reyranella</i>             | W1           | 4.354520    | 4.155697         | 0.000342      |
|          | <i>RB41</i>                   | W1           | 5.050913    | 4.607000         | 0.022805      |
|          | <i>MND1</i>                   | W1           | 4.682856    | 4.424279         | 0.000602      |
|          | <i>Haliangium</i>             | W1           | 4.574262    | 4.020340         | 0.030672      |
|          | <i>Kitasatospora</i>          | W2           | 4.777100    | 4.286802         | 0.006644      |
|          | <i>Streptomyces</i>           | W2           | 4.774355    | 4.383982         | 0.016476      |
|          | <i>Luedemannella</i>          | W2           | 4.663654    | 4.295329         | 0.000374      |
|          | <i>Candidatus_Solibacter</i>  | T1           | 4.689228    | 4.236479         | 0.013984      |
|          | <i>Anaeromyxobacter</i>       | T1           | 4.749679    | 4.408057         | 0.000350      |
|          | <i>Bacillus</i>               | T2           | 5.134566    | 4.689938         | 0.007352      |
|          | <i>Bradyrhizobium</i>         | T2           | 5.097985    | 4.523772         | 0.000654      |
|          | <i>Candidatus_Udaeobacter</i> | X1           | 4.987426    | 4.565805         | 0.012744      |
|          | <i>Acidothermus</i>           | X1           | 5.072493    | 4.749311         | 0.011610      |
|          | <i>Sphingomonas</i>           | X1           | 4.759445    | 4.293756         | 0.005530      |
|          | <i>HSB_OF53-F07</i>           | X1           | 4.761487    | 4.419299         | 0.020989      |
|          | <i>Bryobacter</i>             | X2           | 4.515087    | 4.105184         | 0.001488      |
|          | <i>Actinoallomurus</i>        | X2           | 4.420967    | 4.148947         | 0.026955      |
|          | <i>Pseudonocardia</i>         | X2           | 4.376521    | 4.064796         | 0.000294      |
|          | <i>Conexibacter</i>           | X2           | 4.766628    | 4.370470         | 0.003992      |
|          | <i>FCPS473</i>                | X2           | 4.876113    | 4.561331         | 0.000403      |
| Fungi    | <i>Species name</i>           | <i>group</i> | <i>Mean</i> | <i>LDA_value</i> | <i>Pvalue</i> |
|          | <i>Gonytrichum</i>            | W1           | 4.486678    | 4.303970         | 0.009794      |
|          | <i>Acremonium</i>             | W1           | 4.650954    | 4.478092         | 0.009031      |
|          | <i>Neocosmospora</i>          | W1           | 4.627346    | 4.478850         | 0.000169      |
|          | <i>Mortierella</i>            | W1           | 4.994712    | 4.649244         | 0.030236      |
|          | <i>Apiotrichum</i>            | W1           | 5.198802    | 4.886796         | 0.000625      |
|          | <i>Exophiala</i>              | W1           | 4.713527    | 4.482962         | 0.005590      |
|          | <i>Fusarium</i>               | W1           | 4.914217    | 4.566031         | 0.000530      |
|          | <i>Saitozyma</i>              | W2           | 5.205070    | 4.836008         | 0.016033      |
|          | <i>Trechispora</i>            | W2           | 5.037194    | 4.684383         | 0.016924      |
|          | <i>Cordana</i>                | W2           | 4.666829    | 4.458914         | 0.001406      |
|          | <i>Hygrocybe</i>              | W2           | 4.731303    | 4.435804         | 0.012853      |
|          | <i>Metarhizium</i>            | W2           | 4.857473    | 4.494690         | 0.028028      |
|          | <i>Leohumicola</i>            | T1           | 4.827901    | 4.510476         | 0.000859      |
|          | <i>Archaeorhizomyces</i>      | T1           | 4.765919    | 4.576460         | 0.000825      |
|          | <i>Pseudallescheria</i>       | T2           | 4.847206    | 4.694836         | 0.044360      |

|                         |    |          |          |          |
|-------------------------|----|----------|----------|----------|
| <i>Cladophialophora</i> | X1 | 5.075464 | 4.736573 | 0.015213 |
| <i>Entoloma</i>         | X1 | 4.902233 | 4.647627 | 0.006644 |
| <i>Agaricus</i>         | X1 | 5.189211 | 4.852097 | 0.010651 |
| <i>Clavaria</i>         | X2 | 5.492799 | 5.165414 | 0.006982 |
| <i>Chaetomium</i>       | X2 | 4.996272 | 4.708027 | 0.002541 |

Note: W1, rhizosphere soil sample of bending type in May; W2, rhizosphere soil sample of bending type in August; T1, rhizosphere soil sample of straight type in May; T2, rhizosphere soil sample of straight type in August; X1, rhizosphere soil sample of introduced straight type in May; X2, rhizosphere soil sample of introduced straight type in August.

Table S6. RDA analysis results of microbial (bacterial, fungal) communities

|          |                                                             | RDA1    | RDA2    | r <sup>2</sup> | <i>p</i> values |
|----------|-------------------------------------------------------------|---------|---------|----------------|-----------------|
| Bacteria | SWC                                                         | -0.4303 | 0.9027  | 0.5924         | 0.001           |
|          | pH                                                          | 0.7565  | 0.654   | 0.7109         | 0.001           |
|          | SOC                                                         | -0.4547 | 0.8907  | 0.7487         | 0.001           |
|          | AP                                                          | -0.8914 | -0.4532 | 0.4533         | 0.001           |
|          | AK                                                          | 0.0756  | 0.9971  | 0.6416         | 0.001           |
|          | NH <sub>4</sub> <sup>+</sup> -N                             | -0.1984 | 0.9801  | 0.6989         | 0.001           |
|          | C: N                                                        | -0.1186 | -0.9929 | 0.0452         | 0.524           |
|          | NH <sub>4</sub> <sup>+</sup> : NO <sub>3</sub> <sup>-</sup> | -0.9512 | 0.3085  | 0.3666         | 0.001           |
|          |                                                             | CCA1    | CCA2    | r <sup>2</sup> | <i>p</i> values |
| Fungi    | SWC                                                         | -0.9517 | -0.3069 | 0.5736         | 0.001           |
|          | pH                                                          | -0.0908 | -0.9959 | 0.7727         | 0.001           |
|          | SOC                                                         | -0.997  | -0.0778 | 0.8020         | 0.001           |
|          | AP                                                          | -0.3842 | 0.9233  | 0.7794         | 0.001           |
|          | AK                                                          | -0.7637 | -0.6455 | 0.8171         | 0.001           |
|          | NH <sub>4</sub> <sup>+</sup> -N                             | -0.8827 | -0.4699 | 0.5437         | 0.001           |
|          | C: N                                                        | -0.4829 | 0.8757  | 0.0298         | 0.668           |
|          | NH <sub>4</sub> <sup>+</sup> : NO <sub>3</sub> <sup>-</sup> | -0.7987 | 0.6017  | 0.2737         | 0.010           |

Note: SWC, soil water content; SOC, soil organic carbon; AP, available phosphorus; AK, available potassium; NH<sub>4</sub><sup>+</sup>-N, ammonia nitrogen; C: N, the ratio between soil organic carbon and soil total nitrogen; NH<sub>4</sub><sup>+</sup>: NO<sub>3</sub><sup>-</sup>, the ratio between ammonia nitrogen and nitrate nitrogen.
